# Supplementary material for: Blood-Derived α-Synuclein Aggregated in the Substantia Nigra of Parabiotic Mice
Source: MDPI journal article supplement (doi:10.3390/biom11091287), 2021-08-29
Supplement: s1 [file s1]

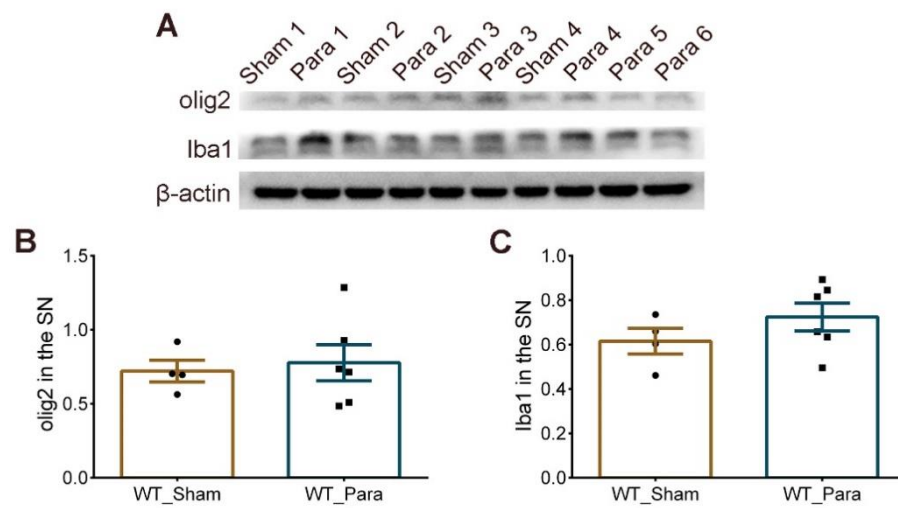

**Figure S1** The levels of Iba1 and olig2 in the SN of WT mice after parabiosis.

**(A,B)** No change was found in the levels of Iba1 and olig2 in the SN of WT mice after 4-month parabiosis, compared with WT-WT sham-operated group. (n=4, 6, the specific levels of each sample in different groups were shown as “•” and “■”).
